# Supplementary material for: Aminoparticles – synthesis, characterisation and application in water purification
Source: Royal Society of Chemistry journal article supplement (doi:10.1039/c5ra01675d), 2015-01-01
Supplement: c5ra01675d1.pdf [file c5ra01675d1.pdf]

## Supporting Information

# Aminoparticles – Synthesis, Characterisation and Application in Water Purification

Roshan Dsouza and Suresh Valiyaveetil\*  
Department of Chemistry, National University of Singapore  
3 Science Drive 3, Singapore 117543  
Email. [chmsv@nus.edu.sg](mailto:chmsv@nus.edu.sg)

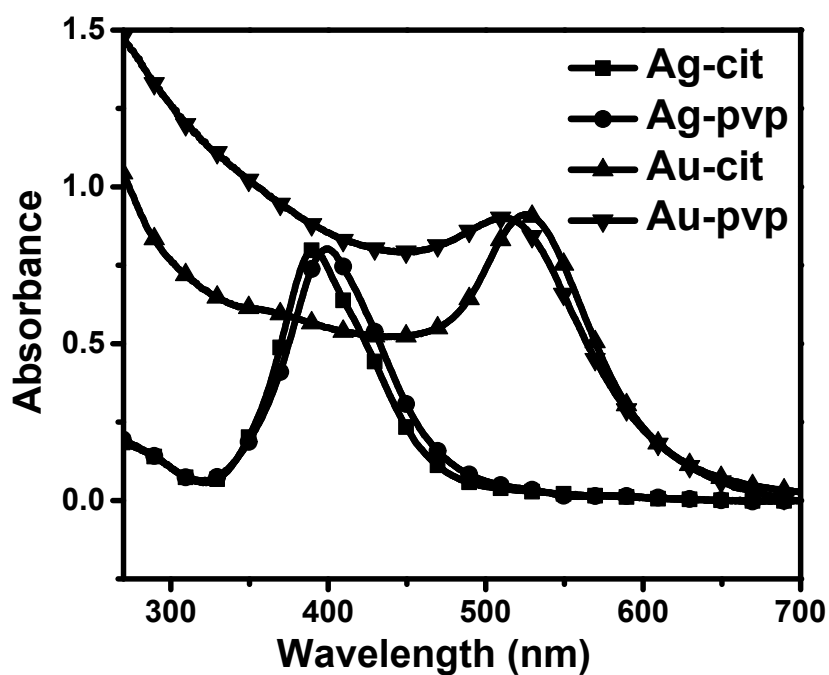

**Figure S1.** UV-visible spectra of Au and Ag NPs.

**Table S1.** Dynamic light scattering (DLS) for diameter and electrokinetic surface charge measurement for PVP and citrate capped Au and Ag NPs.

| <b>Nanoparticle</b> | <b>Size (nm)</b> | <b>Zeta potential (mV)</b> |
|---------------------|------------------|----------------------------|
| Ag – Citrate        | 60.33            | - 40.3                     |
| Ag – PVP            | 40.49            | - 22.9                     |
| Au – Citrate        | 26.38            | - 37.3                     |
| Au – PVP            | 48.29            | - 21.4                     |

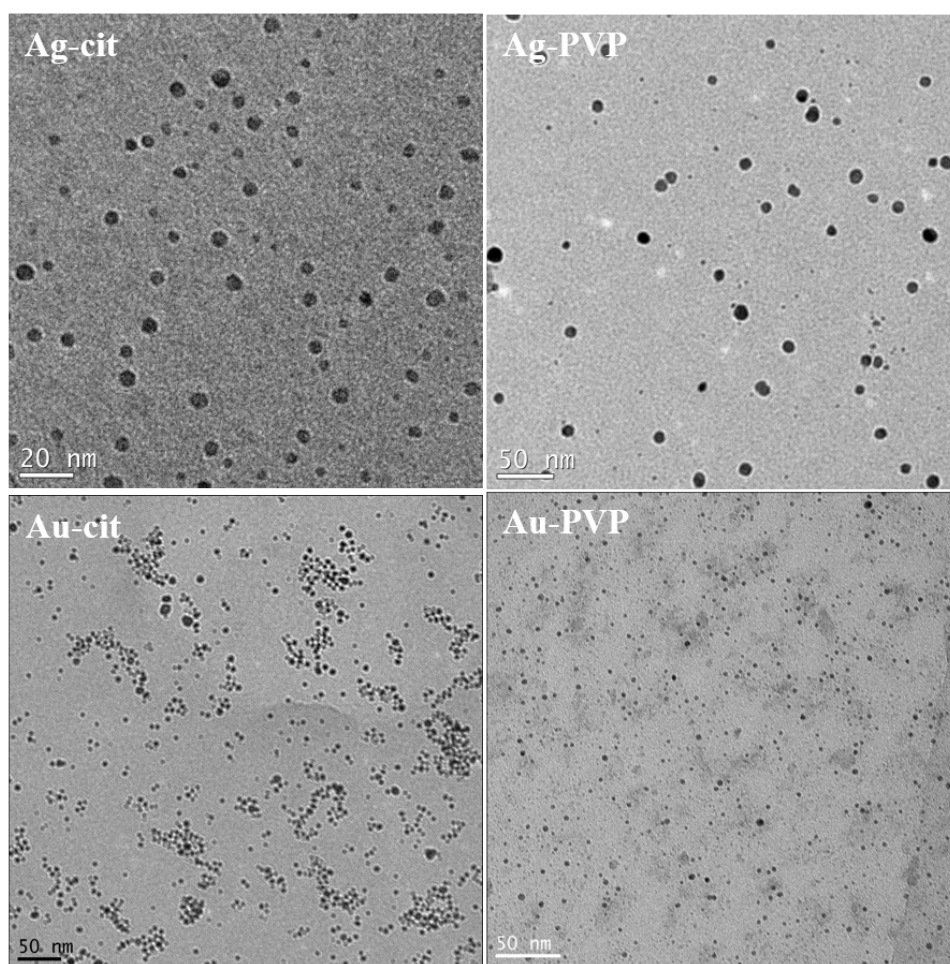

**Figure S2.** TEM images of Au and Ag NPs.

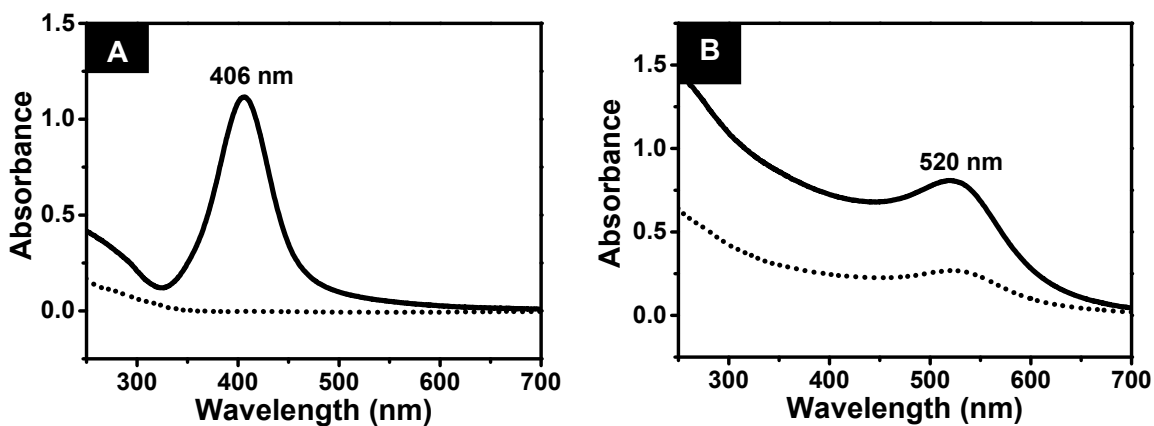

**Figure S3.** Representative UV spectra of the aqueous solutions (A) Ag-PVP and (B) Au-PVP NP's before (solid line) and after (dotted line) extraction using aminoparticles, **P1**.

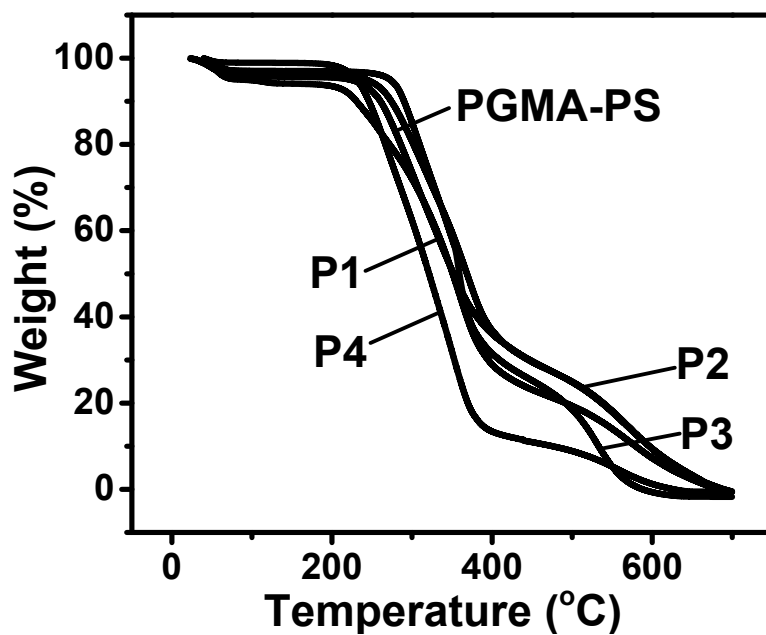

**Figure S4.** TGA traces for all aminoparticles recorded in nitrogen atmosphere.

**Table S2.** Extraction details of metal nanoparticles by aminoparticles **P1 – P4**.

|                        | <b>Amino<br/>particl<br/>es</b> | <b>P1</b>                         |                      | <b>P2</b>                         |                      | <b>P3</b>                         |                      | <b>P4</b>                         |                      |
|------------------------|---------------------------------|-----------------------------------|----------------------|-----------------------------------|----------------------|-----------------------------------|----------------------|-----------------------------------|----------------------|
| <b>NP's</b>            | <b>Time<br/>(min)</b>           | <b>Initial<br/>conc<br/>(ppm)</b> | <b>Qe<br/>(mg/g)</b> | <b>Initial<br/>conc<br/>(ppm)</b> | <b>Qe<br/>(mg/g)</b> | <b>Initial<br/>conc<br/>(ppm)</b> | <b>Qe<br/>(mg/g)</b> | <b>Initial<br/>conc<br/>(ppm)</b> | <b>Qe<br/>(mg/g)</b> |
| <b>Ag<br/>citrate</b>  | 0                               | 20.27                             | 0                    | 18.75                             | 0                    | 20.27                             | 0                    | 18.75                             | 0                    |
|                        | 2                               | 14.03                             | 62.40                | 14.42                             | 43.27                | 11.60                             | 43.33                | 12.26                             | 32.40                |
|                        | 5                               | 13.41                             | 68.63                | 13.76                             | 49.87                | 10.42                             | 49.23                | 11.54                             | 36.01                |
|                        | 10                              | 13.04                             | 72.30                | 13.65                             | 50.97                | 10.25                             | 50.06                | 11.17                             | 37.85                |
|                        | 20                              | 12.56                             | 77.13                | 13.64                             | 51.03                | 10.26                             | 50.01                | 11.05                             | 38.45                |
|                        | 30                              | 11.59                             | 86.83                | 13.68                             | 50.63                | 10.01                             | 51.27                | 11.04                             | 38.50                |
|                        | 60                              | 11.32                             | 89.53                | 13.54                             | 52.03                | 9.94                              | 51.63                | 10.25                             | 42.43                |
|                        | 120                             | 11.15                             | 91.27                | 13.55                             | 51.97                | 9.88                              | 51.95                | 9.36                              | 46.92                |
| <b>Ag-<br/>PVP</b>     | 0                               | 19.30                             | 0                    | 19.30                             | 0                    | 19.30                             | 0                    | 19.30                             | 0                    |
|                        | 2                               | 14.50                             | 24.02                | 14.64                             | 23.28                | 16.46                             | 14.2                 | 16.69                             | 13.06                |
|                        | 5                               | 14.46                             | 24.22                | 14.53                             | 23.85                | 16.09                             | 16.06                | 16.5                              | 13.98                |
|                        | 10                              | 13.80                             | 27.52                | 14.42                             | 24.38                | 15.91                             | 16.97                | 16.24                             | 15.28                |
|                        | 20                              | 13.57                             | 28.67                | 14.09                             | 26.07                | 15.78                             | 17.58                | 16.13                             | 15.84                |
|                        | 30                              | 13.13                             | 30.85                | 13.86                             | 27.20                | 15.57                             | 18.67                | 15.94                             | 16.80                |
|                        | 60                              | 12.26                             | 35.22                | 13.75                             | 27.73                | 15.06                             | 21.18                | 15.59                             | 18.53                |
|                        | 120                             | 12.31                             | 34.97                | 13.56                             | 28.72                | 15.08                             | 21.11                | 15.21                             | 20.46                |
| <b>Au-<br/>citrate</b> | 0                               | 31.63                             | 0                    | 31.63                             | 0                    | 28.05                             | 0                    | 28.05                             | 0                    |
|                        | 2                               | x                                 | x                    | 16.16                             | 77.33                | x                                 | x                    | 16.55                             | 57.50                |
|                        | 5                               | 16.48                             | 75.75                | 16.03                             | 77.99                | 17.67                             | 51.89                | 16.75                             | 56.49                |
|                        | 10                              | 14.43                             | 86.00                | 15.57                             | 80.29                | 16.69                             | 56.79                | 16.61                             | 57.19                |
|                        | 20                              | 12.63                             | 95.03                | x                                 | x                    | 16.31                             | 58.68                | x                                 | x                    |
|                        | 30                              | 12.49                             | 95.73                | 15.66                             | 79.86                | 16.73                             | 56.56                | 16.69                             | 56.76                |
|                        | 60                              | 10.95                             | 103.4                | 15.73                             | 79.50                | 16.40                             | 58.24                | 16.39                             | 58.30                |
|                        | 120                             | 9.45                              | 110.8                | 14.58                             | 85.25                | 14.87                             | 65.89                | 13.31                             | 73.66                |

|            |     |       |       |       |       |       |      |       |      |
|------------|-----|-------|-------|-------|-------|-------|------|-------|------|
|            | 0   | 33.96 | 0     | 33.96 | 0     | 21.45 | 0    | 21.45 | 0    |
|            | 2   | 31.77 | 10.95 | 31.71 | 13.90 | x     | x    | x     | x    |
|            | 5   | 30.57 | 16.99 | 31.69 | 13.90 | 19.18 | 5.67 | 19.10 | 5.85 |
| <b>Au-</b> | 10  | x     | x     | x     | x     | 19.07 | 5.94 | 18.45 | 7.49 |
| <b>PVP</b> | 20  | 29.04 | 24.64 | 31.15 | 14.08 | x     | x    | x     | x    |
|            | 30  | 28.34 | 28.10 | x     | x     | 18.10 | 8.35 | 17.50 | 9.85 |
|            | 60  | 27.47 | 32.48 | 31.18 | 13.90 | 18.35 | 7.73 | 17.49 | 9.88 |
|            | 120 | 27.54 | 32.10 | 31.18 | 13.90 | 18.43 | 7.55 | 17.52 | 9.80 |

(x denotes no readings were taken)
